# Supplementary material for: Genetic Dissection of an Exogenously Induced Biofilm in Laboratory and Clinical Isolates of E. coli
Source: PLOS journal article supplement (doi:10.1371/journal.ppat.1000432), 2009-05-14
Supplement: S4 (10.1371/journal.ppat.1000432.s004) [file journal.ppat.1000432.s004]

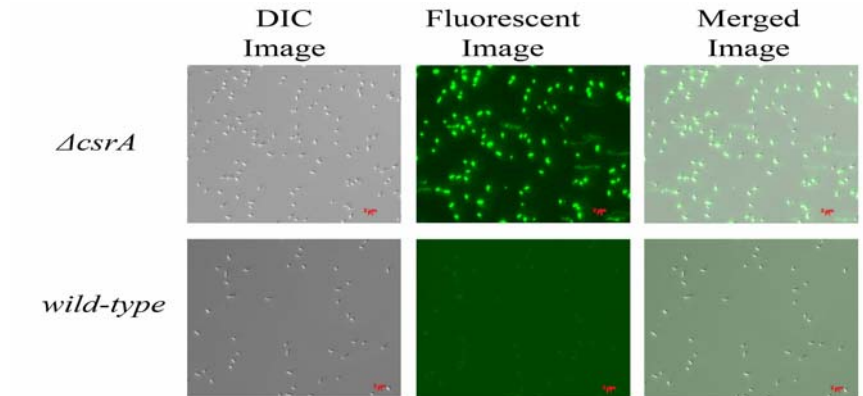

**Figure S1. Reporter assay for *pga* operon activity in the presence or absence of *csrA* deletion.**

Up-regulation of the *pga* locus transcription in the  $\Delta csrA$  background was confirmed by a reporter assay. *pga* promoter was placed upstream of a GFP-coding sequence on a multi-copy plasmid (pPGA'-GFP). The reporter plasmid was electroporated into both wild-type and  $\Delta csrA$  strains. As shown here,  $\Delta csrA$  cells strongly express *gfp* while wild-type cells do not show detectable fluorescence. Scale bars, shown in red, correspond to 2 $\mu$ m.
