# Supplementary material for: Genetic Dissection of an Exogenously Induced Biofilm in Laboratory and Clinical Isolates of E. coli
Source: PLOS journal article supplement (doi:10.1371/journal.ppat.1000432), 2009-05-14
Supplement: S7 (10.1371/journal.ppat.1000432.s007) [file journal.ppat.1000432.s007]

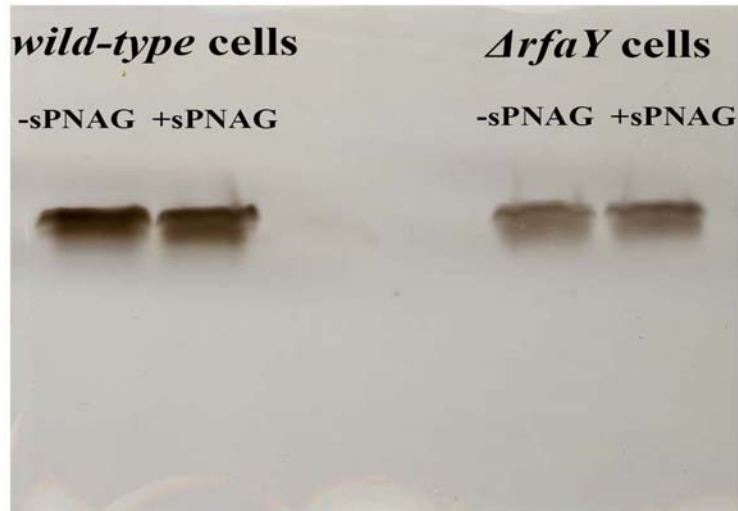

**Figure S4. SDS-PAGE-based analysis of sPNAG-LPS interaction.**

LPS samples were extracted from wild-type and  $\Delta rfaY$  cells previously treated with sPNAG (1U/ml) for 12 hours or nothing (as control). The samples were separated on a 14% SDS gel and silver stained. As shown here, sPNAG pre-treatment of the cells did not cause any change in the migration of their LPS samples on SDS-PAGE gel. This could be due to multiple reasons, including the large molecular weight of sPNAG which is out of the resolution-range of the gel, presence of SDS in the gel and buffer which interferes with electrostatic interactions, or requirement for other components for establishment of the interactions which are present *in vivo*. These results do not rule out the possibility of electrostatic interactions between sPNAG and LPS.
